# Supplementary figures and images for: Residual association at C9orf72 suggests an alternative amyotrophic lateral sclerosis-causing hexanucleotide repeat
Source: PubMed Central journal article supplement — Neurobiol Aging. 2013 Sep;34(9):2234.e1–7. doi: 10.1016/j.neurobiolaging.2013.03.003 (PMC3753508; doi:10.1016/j.neurobiolaging.2013.03.003), 2013-09

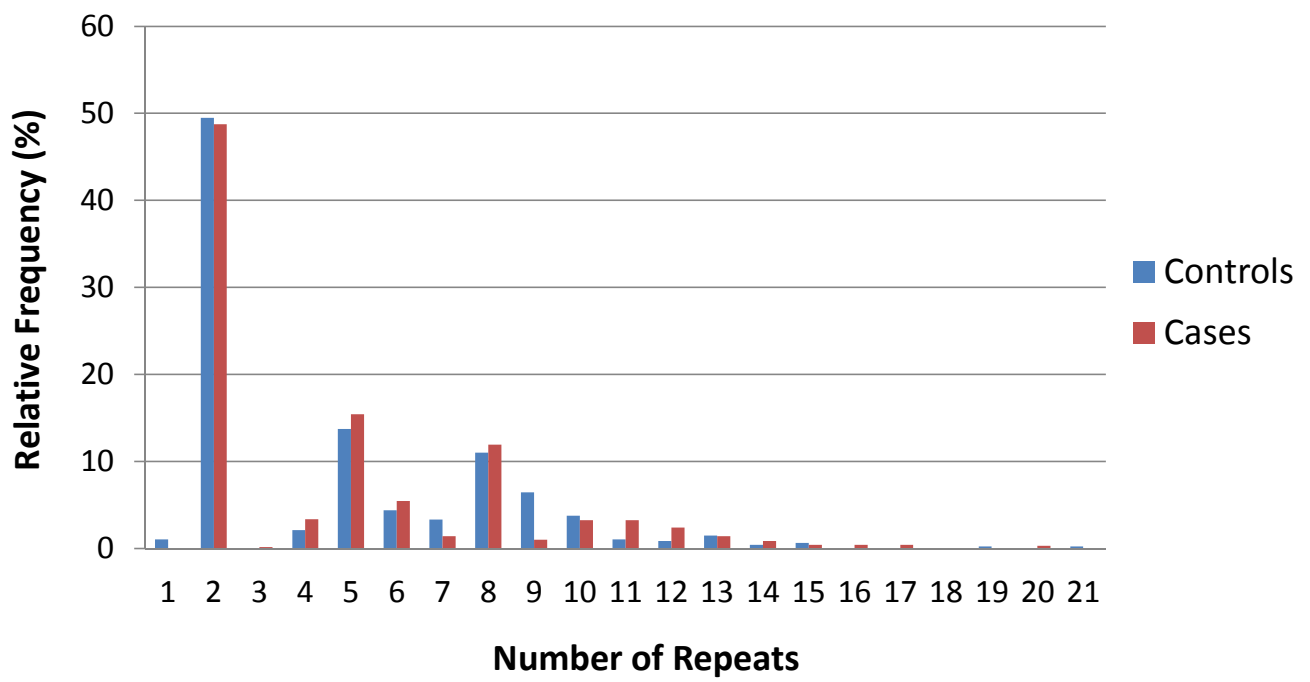

Supplement: mmc2.pdf [file mmc2.pdf]

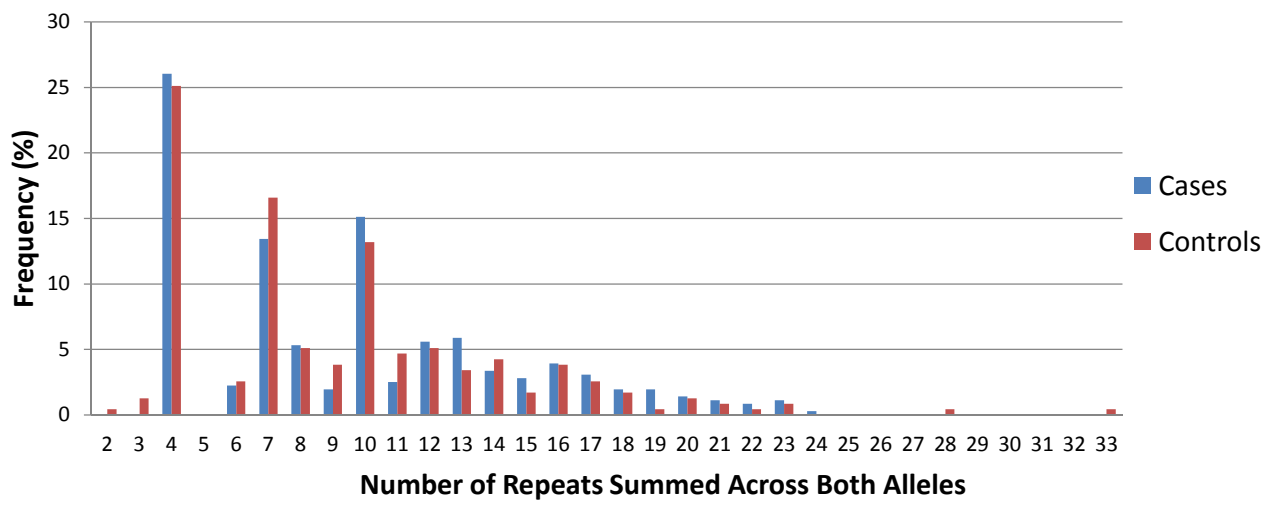

Supplement: mmc3.pdf [file mmc3.pdf]
